# Supplementary material
Source: ML conference proceedings conference paper supplement (https://proceedings.neurips.cc/paper_files/paper/2016/hash/a8f15eda80c50adb0e71943adc8015cf-Abstract.html)
Supplement: Supplementary file 1 [file a8f15eda80c50adb0e71943adc8015cf-Supplemental.zip]

Archive with 1 entries (1 files):
- nips2016_camera-ready_appendix.pdf
